# Supplementary material
Source: MDPI journal article supplement (https://www.mdpi.com/2073-4441/13/5/594)
Supplement: s1 [file s1]

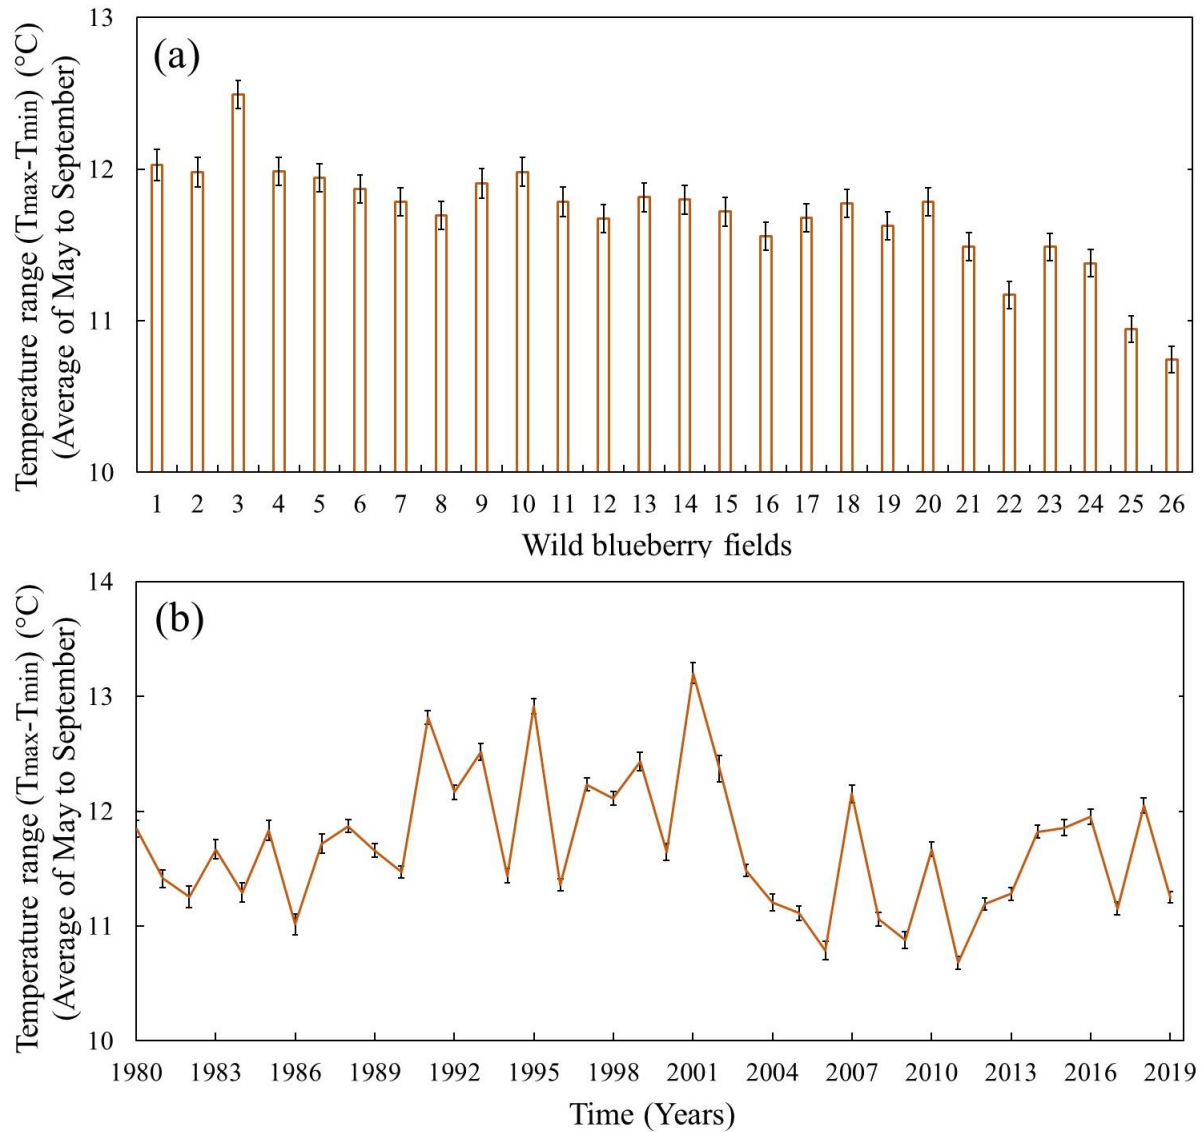

**Figure S2.** (a) Comparison of temperature range ( $T_{\max} - T_{\min}$ ) (average of May - September) from 1980 to 2019 among wild blueberry fields in Downeast Maine. The climate variables are represented as the Mean  $\pm$  Standard error ( $n = 40$ ; where 40 represents the years from 1980 to 2019). (b) Historical (1980 to 2019) changes in temperature range ( $T_{\max} - T_{\min}$ ) (average of May - September) at the 26 wild blueberry fields (shown in Fig. 1) in Downeast Maine. The climate variables from the fields are represented as the Mean  $\pm$  Standard error ( $n = 26$ ).
