# Supplementary material
Source: MDPI journal article supplement (https://www.mdpi.com/2073-4441/13/5/594)
Supplement: s1 [file s1]

**Table S1.** Changes (increasing or decreasing) in climate variables ( $T_{\max}$ ,  $T_{\min}$ ,  $T_{\text{avg}}$ , and  $P_{\text{total}}$ ) over last 40 years from 1980 to 2019 at the studied 26 wild blueberry fields in Downeast, Maine as well as at the overall state of Maine.  $T_{\max}$ ,  $T_{\min}$ , and  $T_{\text{avg}}$  represent the maximum, minimum, and average temperatures, respectively averaged from May to September;  $P_{\text{total}}$  represents the total precipitation from May to September.

| Wild blueberry<br>fields in Fig. 1 | Changes [Increase (+) or Decrease (-)] over 40 years from 1980 to 2019 |                 |                       |                         |
|------------------------------------|------------------------------------------------------------------------|-----------------|-----------------------|-------------------------|
|                                    | $T_{\max}$ (°C)                                                        | $T_{\min}$ (°C) | $T_{\text{avg}}$ (°C) | $P_{\text{total}}$ (mm) |
| 1                                  | +1.30                                                                  | +1.70           | +1.55                 | +30                     |
| 2                                  | +1.40                                                                  | +1.70           | +1.55                 | +30                     |
| 3                                  | +0.75                                                                  | +1.30           | +1.00                 | +25                     |
| 4                                  | +1.45                                                                  | +1.55           | +1.55                 | +30                     |
| 5                                  | +1.40                                                                  | +1.55           | +1.50                 | +30                     |
| 6                                  | +1.30                                                                  | +1.58           | +1.50                 | +38                     |
| 7                                  | +1.25                                                                  | +1.60           | +1.55                 | +30                     |
| 8                                  | +1.34                                                                  | +1.60           | +1.50                 | +44                     |
| 9                                  | +1.00                                                                  | +1.60           | +1.30                 | +40                     |
| 10                                 | +1.00                                                                  | +1.60           | +1.30                 | +35                     |
| 11                                 | +1.30                                                                  | +1.70           | +1.50                 | +55                     |
| 12                                 | +1.35                                                                  | +1.65           | +1.50                 | +50                     |
| 13                                 | +1.20                                                                  | +1.70           | +1.45                 | +50                     |
| 14                                 | +1.20                                                                  | +1.60           | +1.40                 | +55                     |
| 15                                 | +1.00                                                                  | +1.60           | +1.30                 | +50                     |
| 16                                 | +1.35                                                                  | +1.70           | +1.53                 | +46                     |
| 17                                 | +1.25                                                                  | +1.65           | +1.40                 | +58                     |
| 18                                 | +1.10                                                                  | +1.55           | +1.35                 | +43                     |
| 19                                 | +1.25                                                                  | +1.65           | +1.45                 | +60                     |
| 20                                 | +1.05                                                                  | +1.50           | +1.28                 | +50                     |
| 21                                 | +1.25                                                                  | +1.70           | +1.48                 | +75                     |
| 22                                 | +1.45                                                                  | +1.55           | +1.50                 | +70                     |
| 23                                 | +1.20                                                                  | +1.65           | +1.42                 | +75                     |
| 24                                 | +1.30                                                                  | +1.62           | +1.45                 | +78                     |
| 25                                 | +1.50                                                                  | +1.55           | +1.53                 | +80                     |
| 26                                 | +1.50                                                                  | +1.45           | +1.48                 | +80                     |
| State of Maine                     | +0.95                                                                  | +1.25           | +1.10                 | +60                     |
