# Supplementary material
Source: MDPI journal article supplement (https://www.mdpi.com/2073-4441/13/5/594)
Supplement: s1 [file s1]

**Table S2.** Regression analysis between climate variables ( $T_{\max}$ ,  $T_{\min}$ ,  $T_{\text{avg}}$ ,  $P_{\text{total}}$  and Rainfall anomaly) and Maximum Enhanced Vegetation Index ( $\text{EVI}_{\max}$ ) at the studied 26 wild blueberry fields in Downeast, Maine.  $T_{\max}$ ,  $T_{\min}$ , and  $T_{\text{avg}}$  represent the maximum, minimum, and average temperatures, respectively averaged from May to September averaged over 40 years (1980 – 2019);  $P_{\text{total}}$  represents the total precipitation from May to September.  $P_{\text{total}}$  and Rainfall anomaly are averaged over 40 years (1980 – 2019) [Numbers are representing the Coefficient of determination ( $R^2$ ) values of the linear or quadratic relationship with the significance of difference:  $P < 0.001^{***}$ ;  $P < 0.01^{**}$ ;  $P < 0.05^*$ ]

| Wild<br>blueberry<br>fields (Fig. 1) | $T_{\max}$ Vs<br>$\text{EVI}_{\max}$ | $T_{\min}$ Vs<br>$\text{EVI}_{\max}$ | $T_{\text{avg}}$ Vs<br>$\text{EVI}_{\max}$ |           | $P_{\text{total}}$ Vs<br>$\text{EVI}_{\max}$ | Rainfall anomaly<br>Vs $\text{EVI}_{\max}$ |           |
|--------------------------------------|--------------------------------------|--------------------------------------|--------------------------------------------|-----------|----------------------------------------------|--------------------------------------------|-----------|
|                                      | Quadratic                            | Linear                               | Linear                                     | Quadratic | Quadratic                                    | Linear                                     | Quadratic |
|                                      |                                      |                                      |                                            |           |                                              |                                            |           |
| 1                                    | 0.13                                 | 0.24*                                | 0.075                                      | 0.092     | 0.081                                        | 0.009                                      | 0.081     |
| 2                                    | 0.28                                 | 0.055                                | 0.009                                      | 0.078     | 0.199                                        | 0.151                                      | 0.199     |
| 3                                    | 0.22                                 | 0.002                                | 0.073                                      | 0.08      | 0.458*                                       | 0.385**                                    | 0.458*    |
| 4                                    | 0.10                                 | 0.09                                 | 0.000                                      | 0.083     | 0.489**                                      | 0.254*                                     | 0.489**   |
| 5                                    | 0.076                                | 0.33*                                | 0.051                                      | 0.053     | 0.476*                                       | 0.394**                                    | 0.476*    |
| 6                                    | 0.196                                | 0.06                                 | 0.009                                      | 0.164     | 0.217                                        | 0.216                                      | 0.217     |
| 7                                    | 0.143                                | 0.004                                | 0.001                                      | 0.032     | 0.203                                        | 0.014                                      | 0.203     |
| 8                                    | 0.006                                | 0.25*                                | 0.05                                       | 0.068     | 0.157                                        | 0.04                                       | 0.157     |
| 9                                    | 0.018                                | 0.03                                 | 0.000                                      | 0.033     | 0.166                                        | 0.122                                      | 0.166     |
| 10                                   | 0.223                                | 0.008                                | 0.072                                      | 0.077     | 0.363*                                       | 0.271*                                     | 0.363*    |
| 11                                   | 0.018                                | 0.055                                | 0.01                                       | 0.01      | 0.208                                        | 0.053                                      | 0.208     |
| 12                                   | 0.07                                 | 0.052                                | 0.003                                      | 0.032     | 0.079                                        | 0.047                                      | 0.079     |
| 13                                   | 0.04                                 | 0.054                                | 0.001                                      | 0.002     | 0.249                                        | 0.16                                       | 0.249     |
| 14                                   | 0.18                                 | 0.012                                | 0.048                                      | 0.053     | 0.351*                                       | 0.269*                                     | 0.351*    |
| 15                                   | 0.277                                | 0.026                                | 0.07                                       | 0.111     | 0.199                                        | 0.071                                      | 0.199     |
| 16                                   | 0.063                                | 0.135                                | 0.001                                      | 0.005     | 0.315                                        | 0.273*                                     | 0.315     |
| 17                                   | 0.044                                | 0.155                                | 0.008                                      | 0.008     | 0.319                                        | 0.294*                                     | 0.319     |
| 18                                   | 0.066                                | 0.04                                 | 0.004                                      | 0.01      | 0.251                                        | 0.204                                      | 0.251     |
| 19                                   | 0.034                                | 0.094                                | 0.007                                      | 0.026     | 0.212                                        | 0.191                                      | 0.212     |
| 20                                   | 0.004                                | 0.019                                | 0.011                                      | 0.035     | 0.04                                         | 0.03                                       | 0.04      |
| 21                                   | 0.163                                | 0.000                                | 0.066                                      | 0.068     | 0.086                                        | 0.086                                      | 0.086     |
| 22                                   | 0.116                                | 0.001                                | 0.027                                      | 0.073     | 0.122                                        | 0.113                                      | 0.122     |
| 23                                   | 0.051                                | 0.068                                | 0.000                                      | 0.002     | 0.288                                        | 0.108                                      | 0.288     |
| 24                                   | 0.007                                | 0.123                                | 0.02                                       | 0.036     | 0.232                                        | 0.16                                       | 0.232     |
| 25                                   | 0.083                                | 0.153                                | 0.142                                      | 0.215     | 0.115                                        | 0.057                                      | 0.115     |
| 26                                   | 0.15                                 | 0.003                                | 0.072                                      | 0.12      | 0.019                                        | 0.017                                      | 0.019     |
