# Supplementary material
Source: MDPI journal article supplement (https://www.mdpi.com/2073-4441/13/5/594)
Supplement: s1 [file s1]

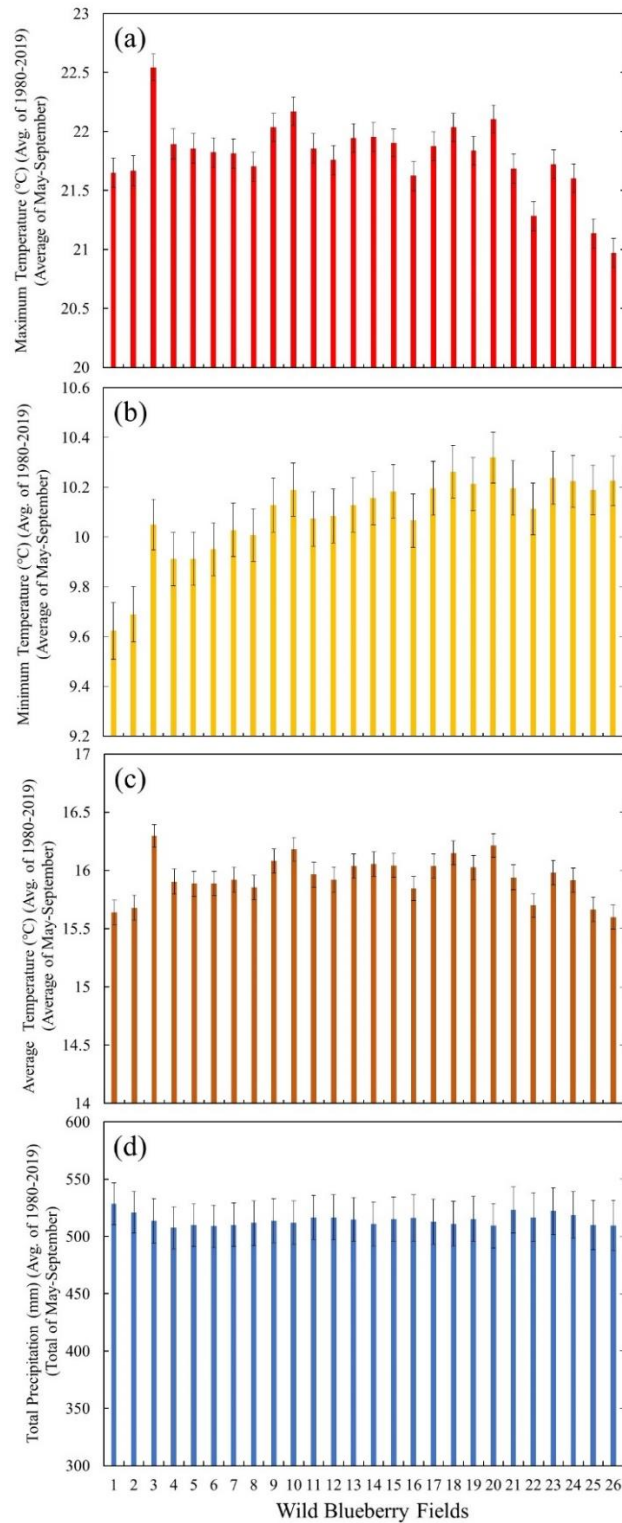

**Figure S1.** Comparison of (a) maximum temperature (average of May - September), (b) minimum temperature (average of May - September), (c) average temperature (average of May - September) and (d) precipitation (total of May - September) from 1980 to 2019 among wild blueberry fields in Downeast Maine. The climate variables are represented as the Mean  $\pm$  Standard error (n = 40; where 40 represents the years from 1980 to 2019).
